# Supplementary material
Source: publisher figshare collection journal article supplement (https://gsapubs.figshare.com/articles/dataset/_/18449630)
Supplement: Supplementary file 1 [file 1]

Pei Lv, Shengyao Yu, Yinbiao Peng, Sanzhong Li, Yongjiang Liu, Chunyu Wang, Deyou Sun, Xingzhou Jiang, Xiangyu Gao, Wentao Ji, and Chuanzhi Li, 2021, The newly discovered ca. 1.35 Ga metamafic rocks in the Oulongbuluke Block, NW China, and its record for transition from the Columbia to Rodinia supercontinent: GSA Bulletin, <https://doi.org/10.1130/B36269.1>.

## Supplemental Material

**Table S1.** U-Th-Pb LA-ICP-MS data of zircons from metamafic rocks in the Oulongbuluke Block.

**Table S2.** LA-MC-ICP-MS Lu-Hf isotope data of zircons from metamafic rocks in the Oulongbuluke Block.

**Table S3.** Major and trace element compositions of metamafic rocks in the Oulongbuluke Block.
